# Supplementary material for: Comparison of NIMS and MALDI platforms for neuropeptide and lipid mass spectrometric imaging in C. borealis brain tissue
Source: Royal Society of Chemistry journal article supplement (doi:10.1039/c3ay26067d), 2013-01-01

## Supplemental Information

### Technical Note

#### **Comparison of NIMS and MALDI platforms for neuropeptide and lipid mass spectrometric imaging in *C. borealis* brain tissue**

Robert M Sturm<sup>1</sup>, Tyler Greer<sup>1</sup>, Ruibing Chen<sup>1</sup>, Broderick Hensen<sup>1</sup>, Lingjun Li<sup>1,2,\*</sup>

<sup>1</sup>Department of Chemistry, University of Wisconsin-Madison

<sup>2</sup>School of Pharmacy, University of Wisconsin-Madison

\*Address reprint requests to:

Dr. Lingjun Li, School of Pharmacy & Department of Chemistry, University of Wisconsin,  
777 Highland Ave, Madison, WI 53705.

E-mail: [lli@pharmacy.wisc.edu](mailto:lli@pharmacy.wisc.edu). Phone: (608)265-8491, Fax: (608)262-5345.

### Supplemental Figure 1:

One  $\mu\text{M}$  of [Arg8] Vasopressin (AVP, CYFQNCPRGa,  $m/z$  1084.45) was deposited across the NIMS surface using “Z-touch” method prior to thaw mounting a 2  $\mu\text{m}$  section of brain tissue onto the NIMS chip. Mass spectrometry imaging resulted in the AVP ion being observed only in areas where tissue was not present on the NIMS chip.

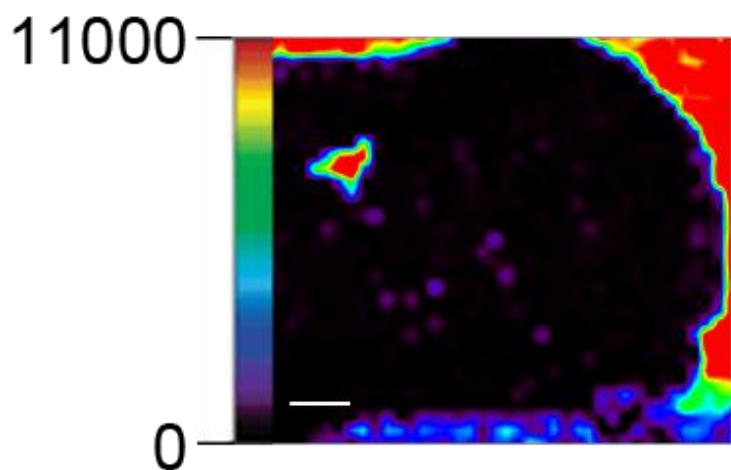

## Supplemental Figure 2:

Mass spectrum of three neuropeptides using optimized MS settings. One  $\mu\text{M}$  of [Arg8] Vasopressin (AVP, CYFQNCPRGa,  $m/z$  1084.45), substance-P (RPKPQQFFGLMa,  $m/z$  1347.73), and neurotensin (pQLYENKPRRPYIL,  $m/z$  1672.94) were applied to the NIMS surface for 1 min using the “Z-touch” method (0.5  $\mu\text{L}$ ).

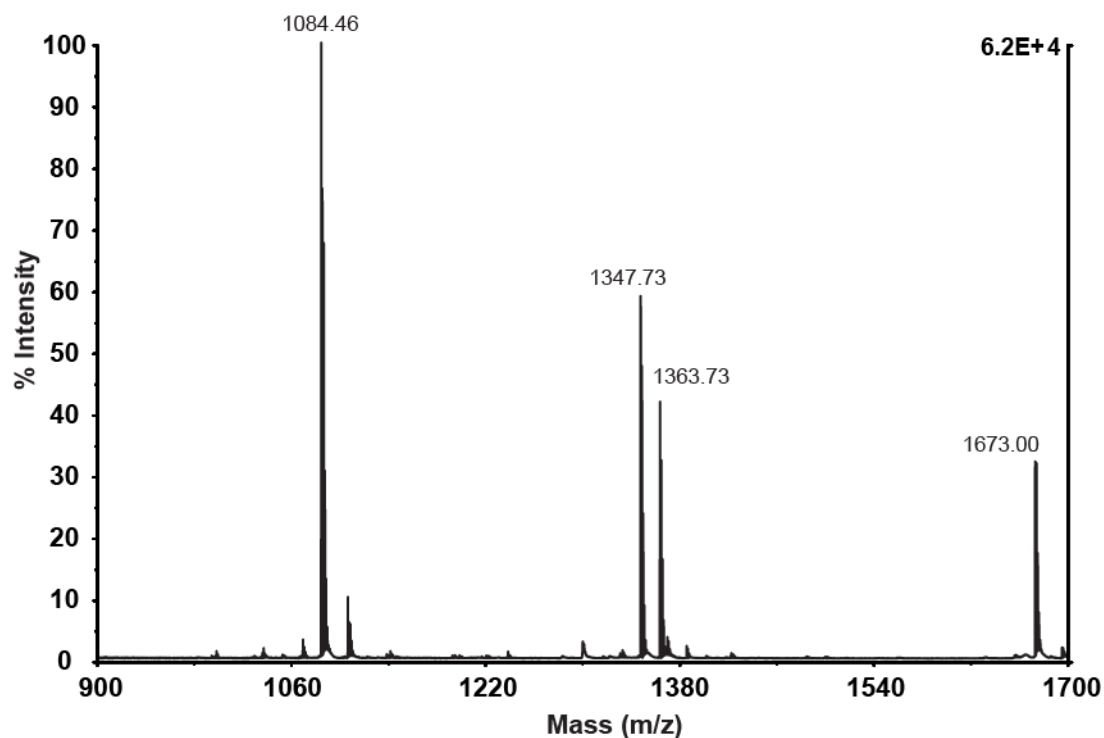

Supplement: c3ay26067d.pdf [file c3ay26067d.pdf]
